# Supplementary material for: Cholesterol biosynthesis pathway as a novel mechanism of resistance to estrogen deprivation in estrogen receptor-positive breast cancer
Source: Springer Nature journal article supplement (doi:10.1186/s13058-016-0713-5), 2016-05-31
Supplement: MOESM8 [file 10244948]

**A**

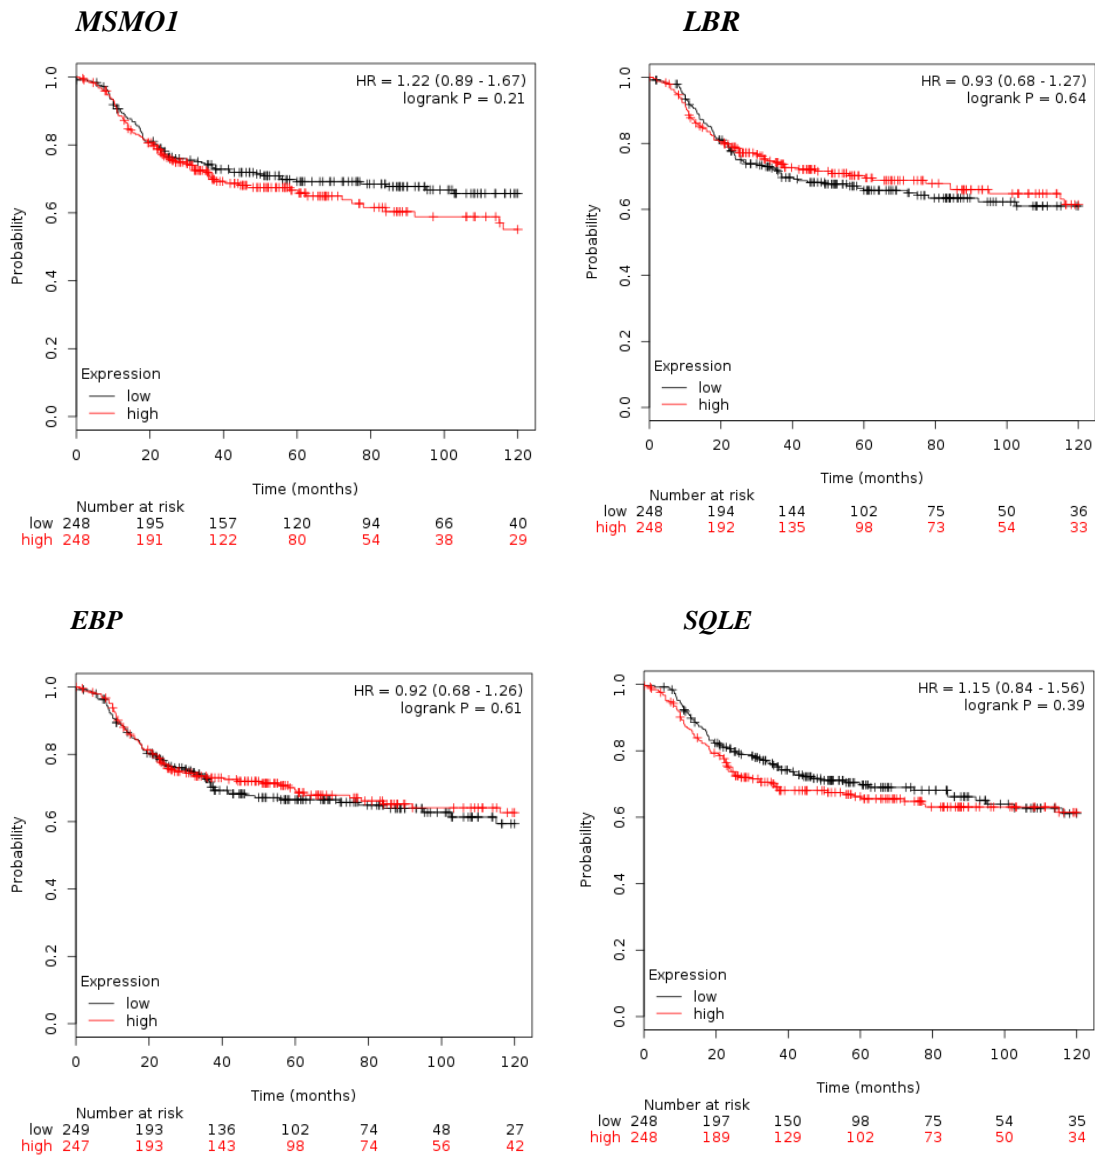

**B**

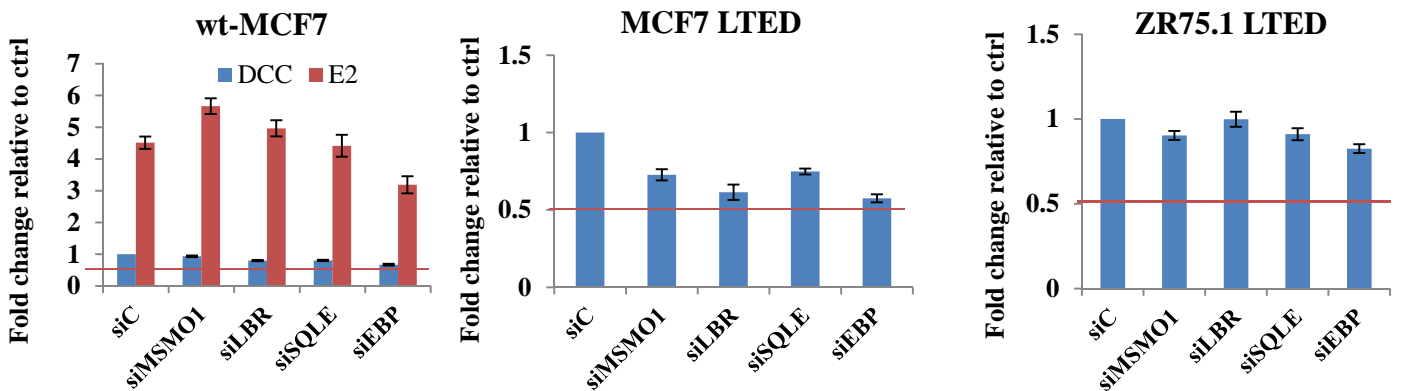

Figure S2
